# Supplementary material
Source: MDPI journal article supplement (https://www.mdpi.com/2073-4344/12/12/1655)
Supplement: s1 [file s1]

# Transfer hydrogenation of biomass-like phenolic compounds and 2-PrOH over Ni-based catalysts prepared using supercritical antisolvent coprecipitation

Alexey A. Philippov\*, Nikolay S. Nesterov, Oleg N. Martyanov

Boriskov Institute of Catalysis, Siberian Branch of the Russian Academy of Sciences, Academician Lavrentiev Avenue 5, 630090, Novosibirsk, Russia  
E-mail address: philippov@catalysis.ru (Alexey A. Philippov, +7-383-32-69-313)

The XRD data of the synthesized catalysts are provided in **Figure S1** and **Table S1**. The phases of  $\text{Ni}^0$  and  $\text{NiO}$  are presented. The mean crystallite size of  $\text{Ni}^0$  does not exceed 6.5 nm, at the same time,  $\text{NiO}$  crystallites are smaller than 3 nm. The TEM microphotographs show that the nanosized particles are aggregated in the bigger ones **Figure S2**. In case of  $\text{NiCu-SiO}_2$  the lattice parameter of  $\text{Ni}^0$  phase is higher compared to the Cu-free catalysts. This fact can show that  $\text{Cu}^0$  is included in the  $\text{Ni}^0$  lattice. This suggestion agrees with EDX data (**Figure S2** (A3,B3)) showing the even distribution of copper over the catalysts.

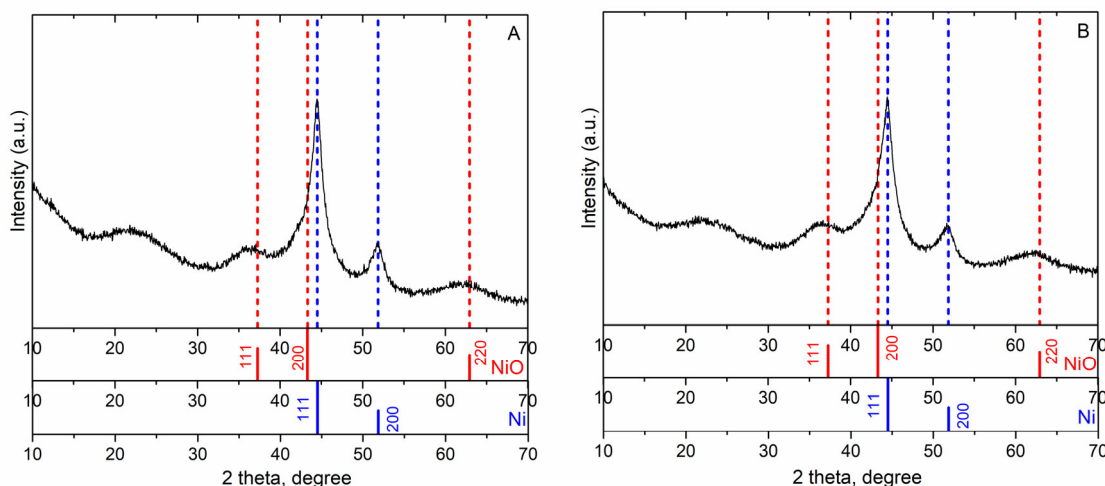

**Figure S1.** XRD data obtained for the catalysts after activation in  $\text{H}_2$ . A –  $\text{Ni-SiO}_2$ , B –  $\text{NiCu-SiO}_2$ .

**Table S1.** Content of Ni and Cu in the Ni-Cu catalysts measured by XRF. D – mean crystallite size, a – lattice parameter, measured by XRD,  $S_{\text{CO}}$  – surface area, measured by CO adsorption.

| Sample              | Ni, wt. % | Cu, wt. % | D( $\text{Ni}^0$ ), nm | a( $\text{Ni}^0$ ), Å | $S_{\text{CO}}$ , $\text{m}^2/\text{g}$ |
|---------------------|-----------|-----------|------------------------|-----------------------|-----------------------------------------|
| $\text{Ni-SiO}_2$   | 36.4      | -         | 6.0                    | 3.524                 | 35                                      |
| $\text{NiCu-SiO}_2$ | 40.7      | 4.0       | 6.5                    | 3.553                 | 32                                      |

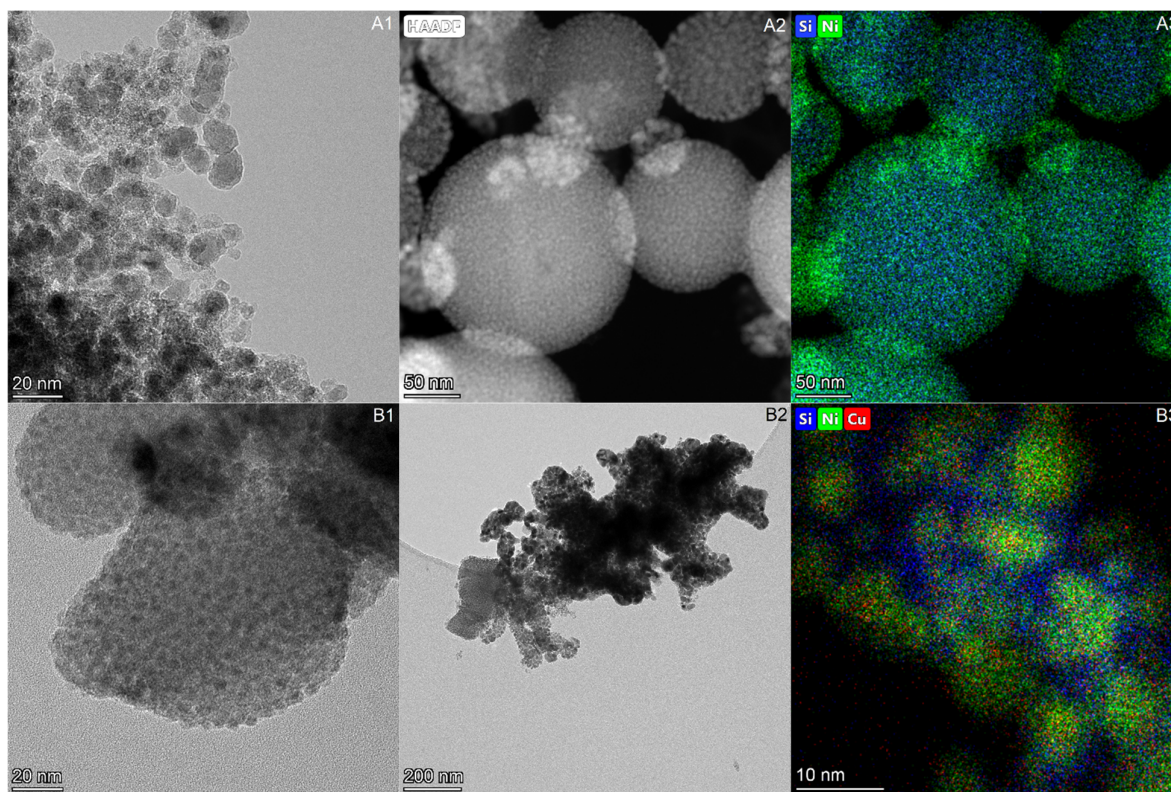

Figure S2. TEM and EDX-mapping pictures obtained for A – Ni-SiO<sub>2</sub>, B – NiCu-SiO<sub>2</sub>.

The kinetic constants of phenolic compound consumption were calculated using **Equation 3** (see the main text). The calculated constants ( $k$ ), constants of acetone quasi-equilibrium between the solution and the catalyst surface are given in **Figures S3–S6**. The coefficient of determination is provided as well.

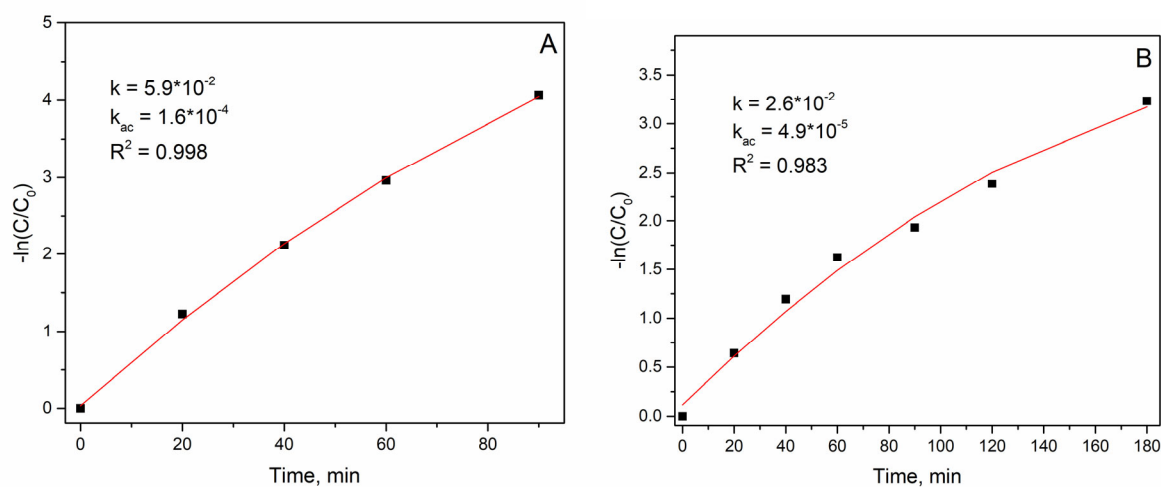

Figure S3. Kinetic data for the experiments with guaiacol over A – Ni-SiO<sub>2</sub> and NiCu-SiO<sub>2</sub>. The first order kinetic model was used, the dots – experimental data, the lines – calculated using **Equation 3**.

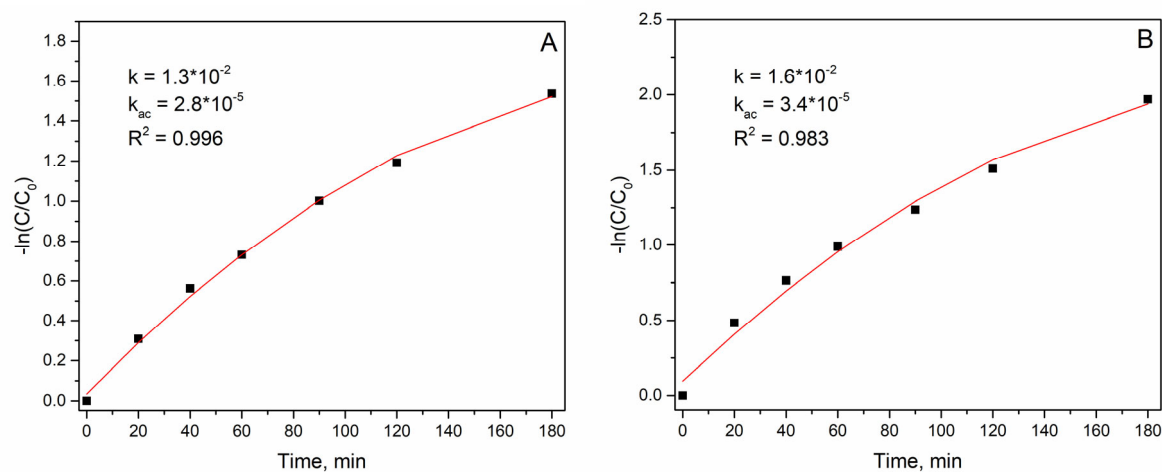

**Figure S4.** Kinetic data for the experiments with 1,2-DMB over A – Ni-SiO<sub>2</sub> and NiCu-SiO<sub>2</sub>. The first order kinetic model was used, the dots – experimental data, the lines – calculated using Equation 3.

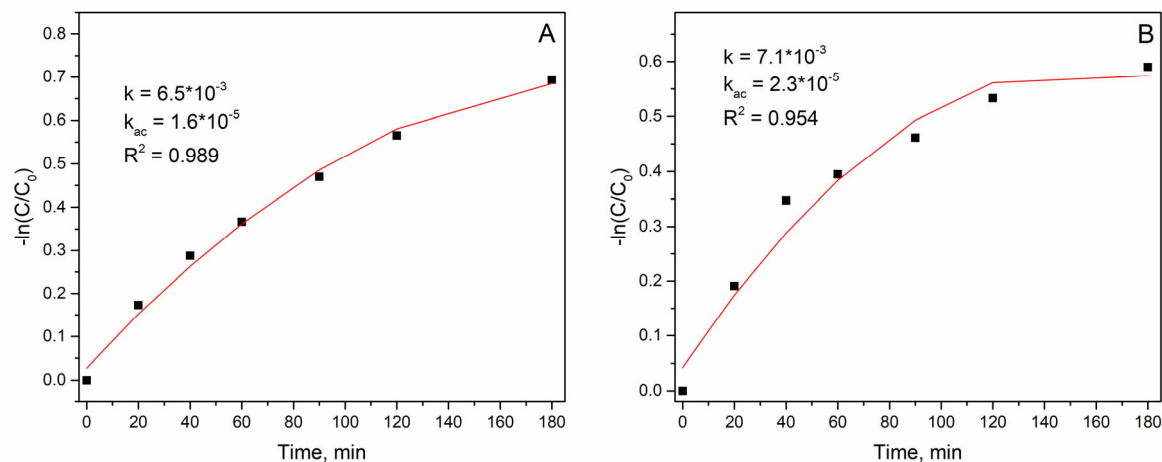

**Figure S5.** Kinetic data for the experiments with 1,3-DMB over A – Ni-SiO<sub>2</sub> and NiCu-SiO<sub>2</sub>. The first order kinetic model was used, the dots – experimental data, the lines – calculated using Equation 3.

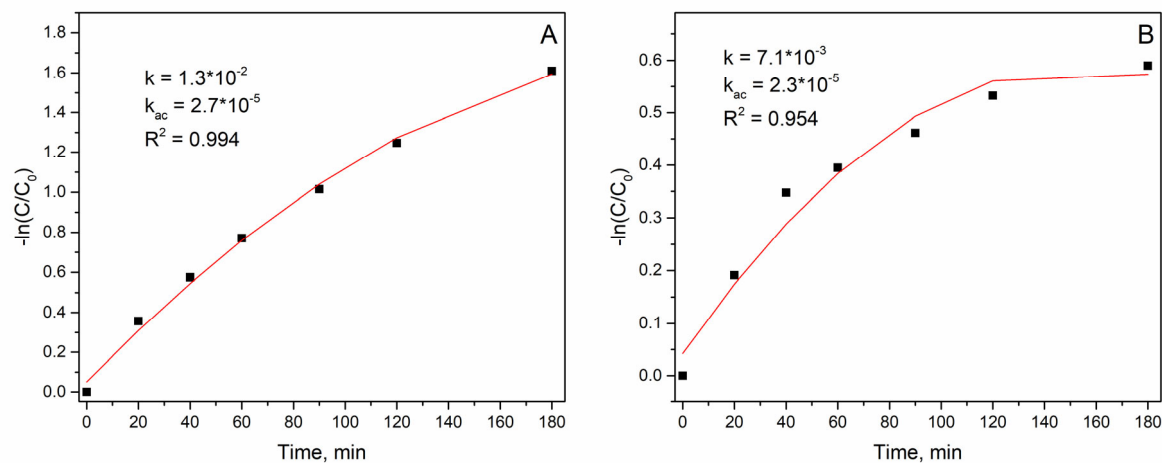

**Figure S6.** Kinetic data for the experiments with 1,4-DMB over A – Ni-SiO<sub>2</sub> and NiCu-SiO<sub>2</sub>. The first order kinetic model was used, the dots – experimental data, the lines – calculated using Equation 3.
